1 **Title:** Oral RNAi of *diap1* in a pest results in rapid reduction of crop damage

2 **Authors:** Yasuhiko Chikami<sup>a,b</sup>, Haruka Kawaguchi<sup>a</sup>, Takamasa Suzuki<sup>c</sup>, Hirofumi

3 Yoshioka<sup>d</sup>, Yutaka Sato<sup>d,e,f</sup>, Toshinobu Yaginuma<sup>d</sup> and Teruyuki Niimi<sup>a,b,d, 1</sup>

4 **Author affiliations:**

5 <sup>a</sup>Division of Evolutionary Developmental Biology, National Institute for Basic Biology,  
6 Nishigonaka 38, Myodaiji, Okazaki, Aichi 444-8585, Japan

7 <sup>b</sup>Department of Basic Biology, School of Life Science, SOKENDAI (The Graduate  
8 University for Advanced Studies), Nishigonaka 38, Myodaiji, Okazaki, Aichi 444-8585,  
9 Japan

10 <sup>c</sup>Department of Biological Chemistry, College of Bioscience and Biotechnology, Chubu  
11 University, Matsumoto-cho 1200, Kasugai, Aichi 487-8501, Japan

12 <sup>d</sup>Graduate School of Bioagricultural Sciences, Nagoya University, Furo-cho, Chikusa,  
13 Nagoya, Aichi 464-8601, Japan

14 <sup>e</sup>Plant Genetics Laboratory, Genetic Strains Research Center, National Institute of  
15 Genetics, Yata 1111, Mishima, Shizuoka 411-8540, Japan

16 <sup>f</sup>Department of Genetics, School of Life Science, SOKENDAI (The Graduate  
17 University for Advanced Studies), Yata 1111, Mishima, Shizuoka 411-8540, Japan

18 <sup>1</sup> **Corresponding author:**

19 Teruyuki Niimi

20 E-mail: [niimi@nibb.ac.jp](mailto:niimi@nibb.ac.jp)

21 Division of Evolutionary Developmental Biology, National Institute for Basic Biology,  
22 Nishigonaka 38, Myodaiji, Okazaki, Aichi 444-8585, Japan

23 TEL: +81 564 55 7606

24

25 **Abstract**

26 Selecting an appropriate target gene is critical to the success of feeding RNA interference  
27 (f-RNAi)-based pest control. Gene targets have been chosen based on their ability to  
28 induce lethality. However, lethality induction by f-RNAi is slow-acting and crop damage  
29 can progress during this time. Here, we show that f-RNAi of *death-associated inhibitor*  
30 *of apoptosis protein 1 (diap1)*, but not two conventional targets *vacuolar ATPase subunit*  
31 *A* and *E*, induces acute feeding cessation in the solanaceous pest, *Henosepilachna*  
32 *vigintioctopunctata* during 24–48 hours. We also found that the feeding cessation by  
33 *diap1* f-RNAi has species-specificity and occurs with only 1.6 ng dsRNA. Our results  
34 suggest that *diap1* is an appropriate target in the context of rapid reduction of crop damage.  
35 We propose that acute feeding disorder should be assessed as a novel criterion for  
36 selecting appropriate target genes for RNAi-based pest control in addition to the  
37 conventional criterion based on lethality.

38

## 39 **Introduction**

40 Techniques for manipulating endogenous essential genes in pests using RNA interference  
41 (RNAi) have become popular as alternative strategies to conventional chemical pesticides  
42 for use in pest management in the last decade<sup>1,2,3</sup>.

43 Innovative and practical applications of the technology are currently being developed,  
44 such as the use of transgenic plants that produce large amounts of double-stranded RNA  
45 (dsRNA) in the chloroplasts<sup>4</sup> or environmental RNAi applications, such as spraying  
46 dsRNA<sup>5</sup> on crops. Regardless of application method, the selection of an appropriate target  
47 gene is essential to achieve effective pest control<sup>6</sup>. The most target genes reported so far  
48 are housekeeping genes such as the *v-ATPase* genes and metabolic genes such as the  
49 chitin synthase genes (representative targets listed in Baum et al.<sup>2</sup>).

50 Conventionally, the criterion for selecting target genes is a combination of induction of  
51 lethality or growth-inhibition by gene silencing with RNAi<sup>6</sup>. For example, silencing of *v-*  
52 *ATPase subunit A* (*v-ATPase A*) or *v-ATPase subunit E* (*v-ATPase E*) by oral delivery of  
53 the dsRNA causes increased mortality in various pests of the order Coleoptera<sup>7,8,9</sup>,  
54 Lepidoptera<sup>7,10</sup>, Diptera<sup>7</sup>, Hemiptera<sup>11,12</sup> and Orthoptera<sup>13</sup>. Such induction of lethality or  
55 growth-inhibition is extremely effective in terms of pest reduction and eradication.  
56 However neither lethality nor growth-inhibition are phenotype that are quick to induce,  
57 and it takes a certain amount of time before maximal effect of treatment is achieved.  
58 During the long-time span between treatment and phenotype, insect pests can continue to  
59 damage crops. For example, it takes more than a week for the RNAi effect of *v-ATPase*  
60 *A* or *v-ATPase E* to occur. Silencing of *v-ATPase E* requires 9 days to induce 100%  
61 mortality through injected and 25 days to induce 100% mortality through oral RNAi in  
62 *Tribolium castaneum*<sup>14</sup>. Therefore, in order to achieve effective RNAi-based control of

63 herbivorous pests, it would be desirable to evaluate and search for target genes from the  
64 viewpoint of rapid termination of crop damage in addition to the induction of lethality  
65 and growth-inhibition.

66 In this regard, we found that the gene silencing of *death-associated inhibitor of*  
67 *apoptosis protein 1 (diap1)* gene by oral-feeding RNAi (f-RNAi) causes acute feeding  
68 disorder. *diap1* is an insect homolog of the *iap* genes and is known as a suppressor of  
69 apoptosis in the fruit fly, *Drosophila melanogaster*<sup>15</sup>. Diap1 has E3 ubiquitin-ligase  
70 activity<sup>16</sup> and strongly suppresses apoptosis via ubiquitination and degradation of the  
71 caspase protein<sup>17</sup>. Silencing of the *diap1* gene promotes apoptosis activity, leading to  
72 lethality. In addition, the Diap1 protein has an extremely short half-life (c.a. 40 min) in  
73 *Drosophila* S2 cells<sup>18</sup>. In general, short protein half-life is one of the keys for the success  
74 of RNAi targeting protein-coding genes<sup>19</sup>. Therefore, RNAi of the *diap1* gene is expected  
75 to have a powerful effect. In some insects, it is known that *diap1* mRNA highly expresses  
76 in the midgut<sup>20</sup> (Fig. S1 in *D. melanogaster*). For these reasons, *diap1* is one of the  
77 candidate target gene for RNAi pesticides and has been investigated in various pests. So  
78 far, RNAi of the *diap1* gene by injecting the dsRNA into the hemocoel of pest has been  
79 shown to induce over 70% mortality in *T. castaneum* (Coleoptera)<sup>14</sup>, *Anoplophora*  
80 *glabripennis* (Coleoptera)<sup>20</sup>, *Musca domestica* (Diptera)<sup>21</sup>, *Delia radicum* (Diptera)<sup>21</sup>,  
81 *Heliothis virescens* (Lepidoptera)<sup>22</sup>, *Lygus lineolaris* (Hemiptera)<sup>23</sup> and *Apolygus*  
82 *lucorum* (Hemiptera)<sup>24</sup>. Diap1 silencing by f-RNAi has also been reported to induce 30–  
83 78% of mortality in *Agrilus planipennis*<sup>24</sup>, *T. castaneum*<sup>14</sup>, and *Diaphorina citri*<sup>25</sup>. In these  
84 reports, the maximum lethal effect of *diap1* silencing by f-RNAi takes 5–30 days. This  
85 lethal effect of *diap1* by f-RNAi is also dose-dependent. For example, in *A. planipennis*,  
86 the mortality of *diap1* f-RNAi using 1, 6 and 10 µg/µl dsRNA is 30, 35 and 78%,

87 respectively<sup>24</sup>. In *M. domestica* and *D. radicum*, it was reported that *diap1* gene silencing  
88 by injection of the dsRNA induced lethality but the f-RNAi assay did not<sup>21</sup>. The  
89 comparative f-RNAi assay of *diap1* and *v-ATPase E* using *T. castaneum* shows that  
90 silencing of *diap1* causes less mortality than that of *v-ATPase E*<sup>14</sup>. Although there are  
91 differences depending on the species, it seems that lethal effects of *diap1* f-RNA require  
92 a large amount of dsRNA and relatively long time before the effect appears. In the present  
93 study, we evaluated a novel effect of the *diap1* gene as a target of f-RNAi-based pest  
94 control. Our work investigated whether *diap1* rapidly induce cessation of feeding in  
95 addition to the conventional criterion based on lethality.

96 In this dsRNA feeding assay, we used the 28-spotted ladybird, *Henosepilachna*  
97 *vigintioctopunctata*, which is a representative solanaceous pest in Asia (Fig. S2). This  
98 species eats solanaceous plants in both the larval and adult stages. The larvae molts about  
99 once every 3–5 days and pupates at the fourth molting. In this study, we fed *diap1* dsRNA  
100 to 3rd instar larvae, which are easy to bioassay in terms of body size and amount of  
101 feeding. We also compared the effects of *diap1* f-RNAi on feeding disorder with *v-*  
102 *ATPase A* and *v-ATPase E*. For the effect of *diap1* f-RNAi, we also evaluated the species-  
103 specificity and dose-sensitivity, which are generally challenges to select target genes for  
104 RNAi-based pest control.

105

106

## 107 **Results**

108 **Identification and expression of target genes in *H. vigintioctopunctata*.** We isolated  
109 the homologous sequences of three target genes, *diap1*, *v-ATPase A* and *v-ATPase E*, from  
110 cDNA of *H. vigintioctopunctata* (Fig. S3). The *diap1* homologous sequence of *H.*

111 *vigintioctopunctata* was 2012 bp and 391 amino acids. Similar to the report in *D.*  
112 *melanogaster*<sup>17</sup>, the Diap1 homologous sequences had three domains, two baculoviral  
113 inhibitor of apoptosis protein repeats (BIR) and one really interesting new gene (RING)  
114 domain. The *v-ATPase A* and *v-ATPase E* homologous sequence of *H. vigintioctopunctata*  
115 had 2503 bp and 1282 bp, respectively. The V-ATPase A and V-ATPase E homologous  
116 sequence had 614 and 226 amino acids, respectively. We cannot detect any in-frame  
117 isoforms in these target genes.

118 To confirm the orthology of these genes, we performed molecular phylogenetic  
119 analysis for amino acid sequence of each target gene. All of these genes were located in  
120 the robust supported clade of each gene (Fig. S4). Therefore, the isolated homologous  
121 sequences were identified as the ortholog of each target gene in *H. vigintioctopunctata*.

122 To observe the expression profile of each target gene, we performed RT-PCR using  
123 cDNA from the nerve cord, legs, wing disc, fat body, Malpighian tube, gut and carcass of  
124 *H. vigintioctopunctata* larvae. We confirmed that the *diap1*, *v-ATPase A* and *v-ATPase E*  
125 orthologs were transcribed in whole larval body including the gut (Fig. 1a).

126

127 **Knockdown effect of f-RNAi of target genes in *H. vigintioctopunctata*.** For the oral  
128 feeding RNA interference (f-RNAi) assay, we designed and synthesized the 300–400 bp  
129 double-stranded RNA (dsRNA) targeting each gene (yellow lines in Supplementary  
130 Sequence). We fed 3rd instar larvae with a droplet containing 50 ng of the dsRNA (Fig.  
131 S5,  $n = 7$  larvae for each gene). As the negative control, we fed 3rd instar larvae with the  
132 same dose of *egfp* dsRNA. To evaluate the knockdown effect of each gene, we performed  
133 quantitative (q) RT-PCR using cDNA of the whole-body larvae at two-days after f-RNAi  
134 treatment. The qRT-PCR analysis revealed that the expression level of each target gene

135 in the f-RNAi treated larvae significantly decreased as compared to the control larvae  
136 (Welch's *t* test,  $P = 0.01$ , 0.0007 and 0.0002 in *diap1*, *v-ATPase A* and *v-ATPase E*,  
137 respectively) (Fig. 1b). Compared to the control larvae, the mean expression level of  
138 *diap1*, *v-ATPase A* and *v-ATPase E* in the f-RNAi treated larvae reduced to 50.2, 3.6,  
139 3.4%, respectively. The knockdown effect of *diap1* f-RNAi seems to be lower than that  
140 of *v-ATPase* genes, although, the reduced rate of *diap1* mRNA level is nearly equivalent  
141 to that in previous *diap1* f-RNAi studies<sup>14,20,22,25</sup> showing the obvious phenotype.  
142 Considering these facts, we determined that our knockdown effect of *diap1* is reasonable.  
143 Therefore, our results indicate that the knockdown of each target gene by f-RNAi was  
144 effective in *H. vigintioctopunctata*.

145

146 **Acute feeding disorder effect of *diap1* silencing in *H. vigintioctopunctata*.** To observe  
147 the f-RNAi effect in *H. vigintioctopunctata*, we provided the 3rd instar larvae with 50 ng  
148 (100 ng/ $\mu$ l) of the *diap1*, *v-ATPase A* or *v-ATPase E* dsRNA ( $n = 7$  in each target gene).  
149 Then, we provided the treated larvae with potato leaves as food.

150 At 2 days after f-RNAi treatment, we found that the body weight significantly  
151 decreased in the *diap1* f-RNAi treated larvae compared to the control larvae fed with *egfp*  
152 dsRNA (Welch's *t* test,  $P < 0.001$ ) (Fig. 1c and Table S1). The mean body weight of the  
153 *diap1* f-RNAi larvae was 2.32 mg, which was 3.5-fold lower than the control larvae. In  
154 contrast to the *diap1* f-RNAi treatment, we cannot detect significant reduction of body  
155 weight in *v-ATPase* genes treated larvae compared to the control larvae (Fig. 1c and Table  
156 S1). We further found that the consumed area of potato leave was reduced in *diap1* f-  
157 RNAi treatment (Fig. 1d). These results suggested that silencing of the *diap1* gene but  
158 not the *v-ATPase* genes could cause feeding disorder in the *H. vigintioctopunctata* larvae.

159 Therefore, in order to evaluate the influence on crop damage after RNAi treatment, we  
160 measured the area of potato leaves consumed by the larvae during 0-24 and 24-48 hours  
161 after dsRNA ingestion (Fig. 1e). As the result, the *diap1* f-RNAi treated larvae showed a  
162 significantly narrower area of consumed leaves than the control larvae within 24 hours  
163 after dsRNA ingestion (mean area: 43.24 mm<sup>2</sup> in *diap1* f-RNAi and 95.54 mm<sup>2</sup> in *egfp* f-  
164 RNAi, Welch's *t* test,  $P < 0.001$ ) (Fig. 1f and Tables S1, S2). The mean leaf area consumed  
165 by the *diap1* f-RNAi treated larvae was 2.2-fold narrower than the *egfp* f-RNAi treated  
166 larvae. Surprisingly, we detected almost complete cessation of crop damage by the *diap1*  
167 f-RNAi treated larvae during 24–48 hours after dsRNA ingestion (mean area: 0.15 mm<sup>2</sup>  
168 in *diap1* f-RNAi and 133.90 mm<sup>2</sup> in *egfp* f-RNAi, Welch's *t* test,  $P < 0.001$ ) (Fig. 1f and  
169 Tables S1, S2). In contrast to the *diap1* f-RNAi, we cannot observe any significant effects  
170 on the consumed leaf area in the *v-ATPase A* and *v-ATPase E* RNAi treatment during both  
171 0–24 and 24–48 hours (Fig. 1f and Tables S1, S2). In *egfp*, *v-ATPase A* and *v-ATPase E*  
172 f-RNAi treatment, the consumed leaf area increased to 108–140% during 24–48 hours  
173 compared to 0–24 hours. In contrast, the leaf area consumed by the *diap1* f-RNAi treated  
174 larvae decreased to 0.35% during 24–48 hours compared to 0–24 hours. All f-RNAi  
175 larvae did not show lethality within 48 hours in our experiments. These results showed  
176 that the f-RNAi of *diap1* but not *v-ATPase* genes induces acute feeding disorder in the  
177 larvae within 24 hours.

178

179 **Species-specificity of *diap1* f-RNAi effect in *H. vigintioctopunctata*.** Species-specificity  
180 is one of the advantages of RNAi-based pest control compared to conventional chemical  
181 pesticides. However, since evolutionary and widely conserved genes generally have an  
182 overall strongly conserved sequence, there is a concern that it is difficult to design a



183 species-specific dsRNA. Therefore, we evaluated species-specificity in the acute feeding  
184 disorder effect by *diap1* silencing.

185 We compared the nucleotide sequences of *diap1* among 10 insect species belonging to  
186 7 orders of Zygentoma, Orthoptera, Hemiptera, Hymenoptera, Coleoptera, Lepidoptera  
187 and Diptera. It showed that the *diap1* sequence had 37.3-53.7% identities among the  
188 insects (Fig. 2a). The identity of *diap1* was lower than that of the *v-ATPase* genes in all  
189 comparative combinations except for the comparisons with *Locusta migratoria* (Figs. 2a,  
190 S6). Notably, the sequences between *H. vigintioctopunctata* and *Harmonia axyridis*  
191 belonging to the same family (Coccinellidae) showed only 53.65% identity in *diap1*,  
192 which was about 1.5-fold lower than those of *v-ATPase A* and *v-ATPase E* (Figs. 2a, S6).  
193 This result showed that *diap1* gene has a moderately diverged sequence compared to *v-*  
194 *ATPase* genes, and suggested that dsRNA targeting the homologous region in *diap1* is  
195 usable for species-specific RNAi pesticide reagents.

196 Then, we validated species-specificity of *diap1* f-RNAi effect on *H.*  
197 *vigintioctopunctata* larvae using 320 ng dsRNAs targeting *diap1* of 4 other insects, *H.*  
198 *axyridis* (Coleoptera), *Blatta lateralis* (Blattodea), *Helicoverpa armigera* (Lepidoptera),  
199 *Oxya yezoensis* (Orthoptera) ( $n = 3$  in each treatment) (Fig. 2b). The dsRNA region of  
200 *diap1* of *H. vigintioctopunctata* identified 50.3, 49.1, 49.3 and 40.1% with *H. axyridis*, *B.*  
201 *lateralis*, *H. armigera* and *O. yezoensis*, respectively. This region did not show  
202 consecutive matches over 16 bp between *H. vigintioctopunctata* and each insect. We  
203 detected that the *diap1* f-RNAi using dsRNA of *H. axyridis* and *O. yezoensis* caused weak  
204 feeding disorder effect in *H. vigintioctopunctata* larvae during 0–24 hours after the  
205 treatment (Fig. 2c). The mean leaf area during 0–24 hours after f-RNAi treatment was 2.5,  
206 4.8, 1.2 and 1.4 -folds lower than the *egfp* f-RNAi larvae in *H. vigintioctopunctata* region

207 1, *H. vigintioctopunctata* region 2, *H. axyridis* and *O. yezoensis* dsRNA treatment,  
208 respectively. The *diap1* f-RNAi also showed the slightly lower consumed leaf area in all  
209 f-RNAi treatments with *diap1* dsRNA of the other species during 24–48 hours after  
210 treatment (Fig. 2c). In contrast, of the f-RNAi treatments, only *H. vigintioctopunctata*  
211 *diap1* dsRNA treatment showed complete feeding cessation during 24–48 hours after the  
212 treatment (Fig. 2c). We also detected the significant reduction of the consumed leaf area  
213 between 0–24 and 24–48 hours after f-RNAi treatment in only *H. vigintioctopunctata*  
214 *diap1* dsRNA treatment (Welch's *t* test,  $P = 0.003$  and  $0.03$  in region 1 and 2, respectively).  
215 The *B. lateralis diap1* dsRNA treatment showed the reduction of the consumed area  
216 between 0–24 and 24–48 hours after the treatment, although, the reduction was only 6.3%  
217 in rate and did not show significant difference (Welch's *t* test,  $P = 0.8$ ) (Table S5). These  
218 results show that the *diap1* dsRNA used here cause weak cross-species effect in the  
219 context of reduction of leaf consuming but not in the context of the feeding cessation and  
220 inhibition of increase in appetite of *H. vigintioctopunctata* larvae.

221

222 **Dose-sensitivity of *diap1* f-RNAi effect in *H. vigintioctopunctata*.** Dosage of dsRNA is  
223 one of the key factors of success in RNAi-based pest control, which is involved in cost  
224 and efficiency of RNAi. Therefore, we investigated the dose-sensitivity of *diap1* f-RNAi.  
225 We provided the *H. vigintioctopunctata* larvae with 0.064, 0.32, 1.6 or 8.0 ng of *diap1*  
226 dsRNA and 1000 ng of *egfp* dsRNA as the negative control ( $n = 4$  in each treatment). We  
227 found that the 8.0 ng (16 ng/ $\mu$ l) dsRNA treatment caused significant decline of the  
228 consumed leaf area during 12–24 hours after f-RNAi (Welch's *t* test,  $P = 0.04$ ) (Fig. 2d,  
229 Table S5). The mean of consumed area of 8.0 ng dsRNA treatment was 9.3-fold narrower  
230 than that of the control. Notably, during both 24–36 and 38–48 hours, almost complete

231 feeding cessation was detected in the 1.6 (3.2 ng/ $\mu$ l) and 8.0 ng dsRNA treated larvae  
232 (Fig. 2d, Table S5). The consumed area of 0.32 ng (0.64 ng/ $\mu$ l) dsRNA treated larvae was  
233 narrower to 39.2–73.5% than the control larvae during 12–48 hours after treatment,  
234 although, this treatment did not show any significant and feeding cessation effect. The  
235 0.016 ng (0.032 ng/ $\mu$ l) dsRNA treated larvae showed up to only 97% less consumed area  
236 than the control larvae and no feeding cessation effect. This result shows that the feeding  
237 disorder effect of *diap1* f-RNAi has dose-sensitivity and only 1.6 ng dsRNA is sufficient  
238 to induce acute feeding cessation effect in the 3rd instar larva of *H. vigintioctopunctata*  
239 during 24–48 hours.

240

241 **Non-recoverability, lethality and growth-inhibition of *diap1* f-RNAi effect in *H.***  
242 ***vigintioctopunctata*.** To verify recoverable, lethal and/or growth-inhibitory effect of  
243 *diap1* f-RNAi in *H. vigintioctopunctata* larvae after the feed cessation effect, we observed  
244 the effects from 48 hours after the treatment with the 8 or 50 ng of *diap1* dsRNA ( $N = 7$   
245 in each target). Following our previous results, the *diap1* f-RNAi larvae exhibited  
246 feeding-cessation and non-lethality within 48 hours after the treatment with both 8 and  
247 50 ng of dsRNA (Fig. 3a–c, Table S6). We found that the 50 and 8 ng of *diap1* dsRNA  
248 caused death of larvae from 48–72 hours (2–3 days) and 72–96 hours (3–4 days) after the  
249 treatment, respectively (Fig. 3c). In addition, all of the treated larvae exhibited lethal  
250 effects up to 4–5 and 5–6 days after the treatment with 50 and 8 ng of dsRNA, respectively  
251 (Fig. 3c). The *diap1* f-RNAi larvae did not show molting into the 4th instar (Fig. 3d). In  
252 contrast, the control larvae fed with 50 ng of *egfp* dsRNA molted into 4th instar larvae  
253 and pupae in 2–4 and 8–10 days after the treatment, respectively (Fig. 3d). We also found  
254 that almost all of the *diap1* f-RNAi larvae continued to exhibit feeding-cessation up to

255 their death (Fig. 3a, b, Table S6). Only one larva fed with 8 ng *diap1* dsRNA showed  
256 slight feeding (0.38 mm<sup>2</sup>) during the day 3–4, but was dead by day 5 (Fig. 3a–c, Table  
257 S6). These results demonstrated that the f-RNAi of *diap1* causes lethality and growth-  
258 inhibition, but not conspicuous recovery of crop damage, in *H. vigintioctopunctata* larvae.  
259

## 260 **Discussion**

261 Searching for and selecting appropriate target gene is the keystone for effective RNAi-  
262 based pest control. In this study, we evaluated the potential of *diap1* gene as a target of  
263 RNAi-based pest control in the context of rapid reduction of crop damage by *H.*  
264 *vigintioctopunctata*.

265 Our f-RNAi assay reveals that silencing of the *diap1* gene causes acute feeding  
266 disorder/cessation in *H. vigintioctopunctata* after only 24–48 hours f-RNAi (Fig. 1). In  
267 this study, the mechanism of the acute feeding disorder by *diap1* silencing is unclear.  
268 However, it is known that Diap1 promotes regeneration of gut via intestinal stem cell  
269 proliferation when intestinal tissue is injured in *Drosophila melanogaster*<sup>26,27</sup>. In addition,  
270 solanaceous plants produce glycoalkaloids, such as the solanine produced by potatoes,  
271 which induces cell damage and apoptosis<sup>28</sup>. Considering this, one possibilities is that  
272 *diap1* silencing by f-RNA suppresses intestinal stem cell proliferation via promotion of  
273 apoptosis and increases the damage caused by the defensive compounds such as solanine  
274 in *H. vigintioctopunctata* larvae. Further research is needed to elucidate the mechanism  
275 of induction of acute feeding disorders by *diap1* f-RNAi.

276 We clarified the species-specificity of the significant feeding disorder effect by *diap1*  
277 f-RNAi (Fig. 2). Cross-species assay using *diap1* dsRNA of other species showed a weak  
278 cross-species effect in the feeding disorder effect. Previous studies using dipteran insects

279 have reported that *diap1* dsRNA with an identical 15 bp sequence region exhibits a cross-  
280 species effect in lethality<sup>21</sup>. In this study, the region of the *diap1* dsRNA had a contiguous  
281 identical 16 bp sequence (Figs. 2b, S10). Based on these facts, the cross-species effect in  
282 the feeding disorder observed in this study is considered to be due to this short identical  
283 sequence. On the other hand, the cross-species effect in this study was not significant and  
284 did not cause any feeding cessation (Fig. 2c). Therefore, we consider that *diap1* f-RNAi  
285 effect has species-specificity in the view of feeding cessation. In the practical application,  
286 the cross-species effect in feeding disorder may be completely eliminated by selecting the  
287 *diap1* dsRNA regions without >15 bp sequence identical among the target pest and the  
288 non-target insects in surrounding habitat.

289 Similar to the induction of the lethal effect of *diap1* f-RNAi in previous studies<sup>21,23,24,25</sup>,  
290 we showed that in *H. vigintioctopunctata*, the effect of *diap1* f-RNAi on feeding disorder  
291 has dose-sensitivity for dsRNA (Fig. 2d). We found that only 1.6 ng (3.2 ng/ $\mu$ l) of dsRNA  
292 is sufficient to induce feeding cessation in *H. vigintioctopunctata* larvae within 48 hours  
293 after the f-RNAi treatment (Fig. 2d). In our experiment, the cost of *diap1* dsRNA *in vitro*  
294 synthesis was about \$0.05/ $\mu$ g dsRNA. Therefore, the lowest cost of feeding cessation  
295 effect of *diap1* f-RNAi is theoretically about  $\phi$ 1 per a thousand *H. vigintioctopunctata*  
296 larvae in our protocol. These suggest that by *diap1* silencing, induction of acute feeding  
297 disorder is achieved using very small amounts of dsRNA, and thus can be utilized as a  
298 low cost and high efficiency of RNAi-based pest control.

299 We showed that all of the *diap1* f-RNAi larvae lead to death during the days 2–6 days  
300 (Fig. 3). This lethal effect is rapid compared to that of the previous study in *A. planipennis*  
301 (10 days for 78% mortality)<sup>24</sup>. Since all of the *diap1* f-RNAi larvae were dead within 1-  
302 4 days after the feeding cessation, this rapid lethality may have occurred as a result of the

303 acute feeding cessation, either indirectly or directly.

304 We compared the feeding disorder effect between *diap1* and *v-ATPase A* and *v-ATPase*  
305 *E*. The *v-ATPase* genes are reported as efficient targets of f-RNAi in various pests<sup>8,14</sup>.  
306 Significantly, we show that the acute feeding cessation can be caused by ingestion of 50  
307 ng *diap1* dsRNA, but not that of the same dose of both *v-ATPase A* and *v-ATPase E*, in  
308 *H. vigintioctopunctata* (Fig. 1). In addition, the feeding cessation effect persists until  
309 death in the larvae fed with 50 or 8 ng *diap1* dsRNA. While we have not analyzed feeding  
310 disorder and lethality of silencing of *v-ATPase* genes from 48 hours after f-RNAi, our  
311 results suggest that the crop damage of *H. vigintioctopunctata* larvae would be more  
312 reduced by f-RNAi of *diap1* than *v-ATPase* genes and *diap1* is a more appropriate target  
313 of RNAi-based pest control in the view of crop damage reduction. We also propose that  
314 the selection of target genes for RNAi-based pest control should be evaluated not only for  
315 induction of lethality/growth-inhibition but also for induction of acute feeding disorders.

316 In conclusion, we show that *diap1* f-RNAi in *H. vigintioctopunctata* causes the species-  
317 specific and highly efficient at inducing acute feeding disorder/cessation, which is a  
318 crucial aspect for crop damage reduction. To date, innovative application technologies for  
319 the practice of RNAi-based pest control have been developed<sup>29</sup>. The main application  
320 technologies are as follows: 1) Utilization of *in vitro* synthesized dsRNA: for example, a  
321 method of drying industrially produced dsRNA and spraying it<sup>5</sup>, 2) Utilization of *in planta*  
322 synthesized dsRNA: for example, a method for producing transgenic plants that  
323 synthesizes dsRNA targeting the pest genes in cell<sup>8,11,12</sup> or chloroplast<sup>4</sup>, 3) Use of *in vivo*  
324 synthesized dsRNA: for example, spraying a large amount of dsRNA synthesized  
325 efficiently by bacteria<sup>30,31</sup>. In this study, we provided the larvae with a droplet containing  
326 dsRNA as an experimental model, but it is our methods are applicable for any of the

327 technologies described above. Recently, it has been clarified that silencing of a dsRNA  
328 binding protein-coding gene, *Staufen* homolog, improves RNAi efficiency via reducing  
329 resistance for RNAi in the Colorado potato beetle<sup>32</sup>. Combining *Staufen* homolog and  
330 *diap1* silencing may cause the feeding disorder effect more efficiently in some pests.

331 It is expected that searching and selecting target genes inducing acute feeding  
332 disorder/cessation by f-RNAi in various herbivorous pests will realize efficient RNAi-  
333 based pest control. This will be able to solve problems such as the dsRNA synthesis cost,  
334 or persistence of crop damage until lethal or growth-inhibitory effect appears.

335

336

## 337 **Material and Methods**

338 **Insects.** *Henosepilachna vigintioctopunctata* were collected from potato leaves at either  
339 Nagoya University or National Institute for Basic Biology, in Japan and used these  
340 animals to establish a laboratory line. Laboratory stocks of *Harmonia axyridis* were  
341 derived from field collections in Aichi, Japan. They were reared as described by Niimi *et*  
342 *al.*<sup>34</sup> *Helicoverpa armigera* was kindly provided by Dr. Chie Goto (NARO Agricultural  
343 Research Center). *Blattella lateralis* were purchased from Remix. The larvae of *Oxya*  
344 *yezoensis* were collected from rice field at Nagoya University.

345

346 **Cloning of partial *diap1* sequences from insects.** Total RNA was extracted from the  
347 gonad of *H. vigintioctopunctata*, the embryos of *H. axyridis*, the anterior wing primordia  
348 of *H. armigera*, the posterior wing primordia of *B. lateralis* or the larval posterior legs of  
349 *O. yezoensis* using TRIzol (Invitrogen, California, USA) according to the manufactural  
350 protocol. The first-strand cDNA was synthesized using the SuperScript II Reverse



351 Transcriptase (Life Technologies Japan Ltd., Tokyo, Japan) with SMART RACE cDNA  
352 Amplification kit (Clontech, Mountain View, California, USA) from 1 µg total RNA.  
353 *diap1* cDNA fragment of each species was amplified using degenerated primer sets  
354 designed from conserved amino acid sequences among insects (*diap1\_F1* or  
355 *diap1\_F2/diap1\_R* in Table S8). The RT-PCR were performed using AmpliTaq Gold DNA  
356 polymerase (Perkin Elmer, Boston, USA). PCR fragments were separated with  
357 electrophoresis using 1% agarose gel in tris-borate-EDTA (TBE) buffer and extracted  
358 using MagExtractor (TOYOBO Co. Ltd., Osaka, Japan). Each PCR fragment was  
359 subcloned into the EcoRV recognition site of pBluescript KS (+) vector (Stratagene, La  
360 Jolla, CA, USA) using DNA Ligation kit Ver. 2 (TaKaRa bio. Inc., Shiga, Japan). The  
361 vector was transformed into XL1-Blue *Escherichia coli* competent cells (GMBiolab Co.,  
362 Ltd, Taichung, Taiwan). The plasmid was extracted from the transformed colony using  
363 FlexiPrep Kit (Amersham Pharmacia Biotech Inc., New Jersey, USA). The nucleotide  
364 sequences of the PCR fragment inserted into vectors were confirmed using the dideoxy  
365 chain-termination method using an automatic DNA sequencer (CEQ 2000XL; Beckman  
366 Coulter, California, USA). Sequence analysis was carried out using a DNASIS system  
367 (Hitachi Software Engineering, Tokyo, Japan). The partial length *diap1* nucleotide  
368 sequences of the insects were deposited in DNA Data Bank of Japan (DDBJ) (accession  
369 numbers: LC473085 in *H. axyridis*, LC473088 in *H. armigera*, LC473087 in *B. lateralis*  
370 and LC473086 in *O. yezoensis*).

371

372 **Rapid amplification of cDNA end (RACE) of *diap1* in *H. vigintioctopunctata*.** To  
373 obtain a full-length *diap1* cDNA in *H. vigintioctopunctata*, the 5'- and 3'- rapid  
374 amplification of cDNA end (RACE) were performed according to the manufacturer's



375 protocol of the SMART RACE cDNA Amplification kit (Clontech, Mountain View,  
376 California, USA). The gene-specific primers are described in Table S8 (1st PCR:  
377 Hvig\_diap1\_1 for 5'-RACE and Hvig\_diap1\_3 for 3'-RACE; nested PCR: Hvig\_diap1\_2  
378 for 5' RACE and Hvig\_diap1\_4 for 3'RACE). These primers were designed from the  
379 *diap1* cDNA fragment cloned above. The cloning and confirmation of nucleotide  
380 sequences of RACE fragment were performed according to the same way as the above  
381 method. The full length *diap1* nucleotide sequences of *H. vigintioctopunctata* was  
382 deposited in DDBJ (accession numbers: LC473084). The *diap1* full-length nucleotide  
383 sequence is shown in Supplementary Sequences.

384

385 **Transcriptomic analysis.** In order to obtain *v-ATPase A* and *v-ATPase E* sequences of *H.*  
386 *vigintioctopunctata*, transcriptomic analysis was performed using total RNA from the  
387 whole body of *H. vigintioctopunctata* 3rd instar larvae. Total RNAs were extracted using  
388 the RNeasy Mini kit (QIAGEN, Tokyo, Japan). The integrity of extracted RNAs were  
389 confirmed using a Bioanalyzer 2000 (Agilent Technologies) and these RNAs were used  
390 to construct cDNA libraries using the Truseq™ RNA Sample Prep Kit (Illumina)  
391 according to the manufacture's instruction. Pair-end sequences with 200 bp were obtained  
392 from these cDNA libraries through Hiseq2000 (Illumina). The raw reads were deposited  
393 in DDBJ Sequence Read Archive (accession number: DRA008720). We rearranged pair-  
394 end reads in order and excluded unpaired reads using cmpfastq\_pe  
395 ([http://compbio.brc.iop.kcl.ac.uk/software/cmpfastq\\_pe.php](http://compbio.brc.iop.kcl.ac.uk/software/cmpfastq_pe.php)). Low quality reads and  
396 adapter sequences were trimmed from obtained short-reads using Cutadapt v1.15<sup>35</sup>. Then,  
397 *de novo* assembly of trimmed short-read sequence was performed using Trinity-v4.2.0  
398 (<https://github.com/trinityrnaseq/trinityrnaseq/>)<sup>36</sup>. We also analyzed the RNA-seq data of *H.*

399 *axyridis* obtained from National Center for Biotechnology Information (NCBI) Sequence  
400 Read Archive database (run number.: ERR1309559) in the same way as *H.*  
401 *vigintioctopunctata*.

402

403 **BLAST search and phylogenetic analysis of target genes.** BLAST databases of the  
404 assembled transcriptomic sequences in *H. vigintioctopunctata* and *H. axyridis* were  
405 established by makeblastdb program in BLAST+ ver. 2.7.1<sup>37</sup>. We searched homologous  
406 genes of *v-ATPase A*, *v-ATPase E* and *diap1* in the *H. vigintioctopunctata* BLAST  
407 database with the orthologues in *Drosophila melanogaster* (accession number: Diap1,  
408 NP\_001261916.1; V-ATPase A, NP\_652004.2; V-ATPase E, NP\_524237.1) obtained  
409 from NCBI database as query sequences using the tblastn program in BLAST+ ver. 2.7.1.  
410 Then, we confirmed the orthology of these obtained sequences by molecular phylogenetic  
411 analysis (Fig. S4). The homologous sequences of V-ATPase A, V-ATPase E and Diap1 in  
412 other animals were obtained from NCBI database (Table S7). All sequences including *H.*  
413 *vigintioctopunctata* homologues were aligned using MAFFT ver. 7<sup>38</sup> with the L-INS-i  
414 program. The using sites for phylogenetic construction were selected by trimAl v1.2<sup>39</sup>  
415 with a gap threshold value of 0.7. The multiple alignments were shown in Figs. S7-S9.  
416 The selection of best-hit substitution model and construction of maximal-likelihood  
417 phylogeny were performed using MEGA X<sup>40</sup>. Bootstrap values were calculated after 1000  
418 replications. BLAST search and multiple alignment were performed under Super  
419 Computer Facilities of National Institute of Genetics. The *diap1*, *v-ATPase A* and *v-*  
420 *ATPase E* nucleotide sequences of *H. vigintioctopunctata* and *H. axyridis* are shown in  
421 Supplementary Sequences.

422

423 **Expression profile analysis of target genes in larval tissues.** Total RNA was extracted  
424 from nerve cord, legs, wing discs fat body, Malpighian tubules, gut and carcass of 4th  
425 instar larvae of *H. vigintioctopunctata* which is the dissectable stage for each tissue using  
426 the RNeasy Mini kit (QIAGEN, Tokyo, Japan). The first-strand cDNA was synthesized  
427 from the 1 µg total RNA using SuperScript III Reverse Transcriptase (Life Technologies  
428 Japan Ltd., Tokyo, Japan). RT-PCR for the target genes and the internal control  
429 (*ribosomal protein 49 (rp49)*, accession number: AB480201) was performed using the  
430 first-strand cDNA and Q5 High-Fidelity DNA Polymerase (New England Biolabs Japan  
431 Inc., Tokyo, Japan) with 30 cycles. Primers for RT-PCR were designed by Primer3web  
432 version 4.1.0<sup>41</sup> and are shown in Table S8 (Hvig\_diap1\_RT-PCR\_F/ Hvig\_diap1\_RT-  
433 PCR\_R, Hvig\_v-ATPase\_A\_RT-PCR\_F/Hvig\_v-ATPase\_A\_RT-PCR\_R, Hvig\_v-  
434 ATPase\_E\_RT-PCR\_F/ Hvig\_v-ATPase\_E\_RT-PCR\_R and Hvig\_rp49\_RT-  
435 PCR\_F/Hvig\_rp49\_RT-PCR\_R). The annealing temperatures for RT-PCR were  
436 calculated by NEB Tm Calculator (<https://tmcalculator.neb.com/>). The expression pattern  
437 was confirmed by agarose gel electrophoresis of the PCR products with 2% Agarose S  
438 (NIPPON GENE Co. Ltd., Toyama, Japan).

439

440 **Double strand RNA synthesis.** For comparison analysis of RNAi efficiency of target  
441 genes, the total RNA was extracted from 3rd instar larvae of *H. vigintioctopunctata* using  
442 TRI Reagent (Molecular Research Center Inc., Ohio, USA) according to the manufactural  
443 protocol. The first-strand cDNA was synthesized from 1 µg total RNA using SuperScript  
444 III Reverse Transcriptase (Life Technologies Japan Ltd., Tokyo, Japan). The templates of  
445 dsRNA were initially amplified from the first-strand cDNA and secondary amplified from  
446 the initial PCR products by RT-PCR using Q5 High-Fidelity DNA Polymerase (New

447 England Biolabs Japan Inc., Tokyo, Japan). The initial PCR primers are described as  
448 Hvig\_diap1\_F/Hvig\_diap1\_R, Hvig\_v-ATPase\_A\_F/Hvig\_v-ATPase\_A\_R and Hvig\_v-  
449 ATPase\_E\_F/ Hvig\_v-ATPase\_E\_R in Table S8. The nested primers were flanked with  
450 T7 promoter sequences on the 5' ends (Hvig\_T7-diap1\_F/Hvig\_T7-diap1\_R, Hvig\_T7-  
451 v-ATPase\_A\_F/Hvig\_T7-v-ATPase\_A\_R and Hvig\_T7-v-ATPase\_E\_F/Hvig\_T7-v-  
452 ATPase\_E\_R in Table S8). The nested PCR products were purified using MagExtractor  
453 (TOYOBO Co. Ltd., Osaka, Japan). The sequences of interest were confirmed by sanger  
454 DNA sequencing service at FASMAC Co. Ltd. (Kanagawa, Japan). The dsRNAs of target  
455 genes were synthesized from the purified PCR products using AmpliScribe T7-Flash  
456 Transcription Kit (Epicentre Technologies, Co., Wisconsin, USA).

457 For Species-specificity and dose analysis of *diap1*, the templates of dsRNA were  
458 amplified from the above pBluescript KS (+) vectors inserted *diap1* sequences in each  
459 insect by PCR using AmpliTaq Gold (Perkin Elmer, Boston, USA). The PCR primers are  
460 described in Table S8 (T7-KS/T7-SK). The PCR products were purified by the same ways  
461 to the above method. The dsRNAs were synthesized using MEGAscript T7 Transcription  
462 Kit (Ambion, Texas, USA).

463

464 **Feeding RNAi assay.** Synthesized dsRNA was artificially fed to 3rd instar larvae of *H.*  
465 *vigintioctopunctata* within 24 hours after molting (Fig. S5). The 0.5 µl solution including  
466 dsRNA of each gene was dropped on slide glasses in front of the larvae which had been  
467 starved after molting to the 3rd instar. The larvae completely consumed the dsRNA  
468 solution. The elapsed time in consumed the solution was 114–542 seconds (median time  
469 = 206.5 seconds). After the larvae had consumed the entire droplet, each larva was put on  
470 a fresh potato leaf and kept in a plastic container at room temperature. Body weight of

471 the larvae after 48 hours were measured using a precision electronic balance (Table S1).  
472 The potato leaves were collected and exchanged for new potato leaves up to 48 hours  
473 every 12 or 24 hours (Fig. 1e). dsRNA of *enhanced green fluorescent protein (egfp)* were  
474 fed to 3rd instar larvae as the negative control.

475

476 **Evaluation of knockdown of mRNAs expression by qRT-PCR.** The total RNA was  
477 extracted from the whole-body of *H. vigintioctopunctata* 3rd instar larvae 48-hours after  
478 f-RNAi treatment using TRI Reagent (Molecular Research Center Inc., Ohio, USA). The  
479 first-strand cDNA was synthesized from 1 µg total RNA using SuperScript III Reverse  
480 Transcriptase (Life Technologies Japan Ltd., Tokyo, Japan). qRT-PCR was performed on  
481 LightCycler 96 instrument (Roche, Basel, Swizerland) using THUNDERBIRD SYBR  
482 qPCR Mix (TOYOBO Co. Ltd., Osaka, Japan) according to the manufactural protocol  
483 with the first-strand cDNA as the template. The same primer sets as the above expression  
484 profile analysis of each gene were used. The expression level of target genes relative to  
485 *rp49* was calculated by the  $2^{-\Delta\Delta C_t}$  method<sup>42</sup>.

486

487 **Measurements of leaf area eaten by feeding RNAi larvae.** We measured the potato leaf  
488 area eaten by f-RNAi larvae using the following method with the digital microscope  
489 system (VHX-5000, KEYENCE, Osaka, Japan). A leaf was put on the glass plate on the  
490 stage and was covered with a plastic wrap. Then, the region of leaf eaten was manually  
491 bordered with a black pen. After focusing on the leaf using 10x magnification, we  
492 automatically binarized the image and measured the area of the region eaten by larvae  
493 with the digital microscope system.

494

495 **Statistical analysis.** We performed the Welch's *t*-test to evaluate the differences of effects  
496 of f-RNAi assay. We adjusted *P*-value with the Holm's methods for the multiple-  
497 comparisons. The significance level used in our analysis was *P*-value < 0.05. All  
498 statistical analyses were performed by R-3.6.0 (<https://cran.r-project.org/>).

499

500 **Expression level of *diap1* in tissues of *Drosophila melanogaster*.** We obtained the  
501 expression dataset of *diap1* (FBgn0260635) in tissue of *Drosophila melanogaster* from  
502 FlyAtlas Anatomical Expression Data<sup>43</sup>. Then, we created the histogram based on the  
503 expression data (Supplementary Fig. 1).

504

505 **Sequence analysis of target genes among insects.** The nucleotide and amino acid  
506 sequences of target genes in 9 insect species were obtained from NCBI's database (Table  
507 S7). Then, multiple alignments were performed for each pair of species using MAFFT  
508 ver.7 with L-INS-i program. The proportions of identical sites for length of coding  
509 sequence region of each gene were manually calculated. The identical sites of partial  
510 sequences of *diap1* between *H. vigintioctopunctata* and other insects using for f-RNAi  
511 assay were identified in the same way (alignment: Fig. S10).

512

513

## 514 **References**

515 1. Price, D. R. G. & Gatehouse, J. A. RNAi-mediated crop protection against insects.  
516 *Trends Biotechnol.* 26, 393–400 (2008).

517 2. Baum, J. A. & Roberts, J. K. Progress Towards RNAi-Mediated Insect Pest  
518 Management. *Adv. Insect Physiol.* 47, 249–295 (2014).

- 519 3. Mamta, B. & Rajam, M. V. RNAi technology: a new platform for crop pest control.  
520 *Physiol. Mol. Biol. Plants* 23, 487–501 (2017).
- 521 4. Zhang, J. et al. Full crop protection from an insect pest by expression of long double-  
522 stranded RNAs in plastids. *Science* 347, 991-994 (2015).
- 523 5. Wang, Y., Zhang, H., Li, H. & Miao, X. Second-generation sequencing supply an  
524 effective way to screen RNAi targets in large scale for potential application in pest insect  
525 control. *PLoS ONE* 6, e18644 (2011).
- 526 6. Katoch, R., Sethi, A., Thakur, N. & Murdock, L. L. RNAi for insect control: current  
527 perspective and future challenges. *Appl. Biochem. Biotechnol.* 171, 847–873 (2013).
- 528 7. Whyard, A., Singh, A. D. & Wong, S. Ingested double-stranded RNAs can act as  
529 species-specific insecticides. *Insect Biochem. Mol. Biol.* 39, 824–832 (2009).
- 530 8. Baum, J. A. et al. Control of coleopteran insect pests through RNA interference. *Nat.*  
531 *Biotechnol.* 25, 1322-1326 (2007).
- 532 9. Wu et al. Lethal RNA interference response in the pepper weevil. *J. Appl. Entomol.*  
533 143, 699–705 (2019).
- 534 10. Burke, W. G. et al. RNA Interference in the Tobacco Hornworm, *Manduca sexta*,  
535 Using Plastid-Encoded Long Double-Stranded RNA. *Front. Plant Sci.* 10,  
536 <https://doi.org/10.3389/fpls.2019.00313> (2019).
- 537 11. Thakur, N. et al. Enhanced Whitefly Resistance in Transgenic Tobacco Plants  
538 Expressing Double Stranded RNA of *v-ATPase A* Gene. *PLoS ONE* 9, e87235 (2014).
- 539 12. Liu, F. et al. Plant-Mediated RNAi for Controlling *Apolygus lucorum*. *Front. Plant*  
540 *Sci.* 10, <https://doi.org/10.3389/fpls.2019.00064> (2019).
- 541 13. Luo, Y. et al. Differential responses of migratory locusts to systemic RNA interference  
542 via double-stranded RNA injection and feeding. *Insect Mol. Biol.* 22, 574–583 (2013).

- 543 14. Cao, M., Gatehouse, J. A. & Fitches, E. C. A Systematic Study of RNAi Effects and  
544 dsRNA Stability in *Tribolium castaneum* and *Acyrtosiphon pisum*, Following Injection  
545 and Ingestion of Analogous dsRNAs. *Int. J. Mol. Sci.* 19, 1079 (2018).
- 546 15. Hay, B. A., Wassarman, D. A. & Rubin, G. M. Drosophila homologs of baculovirus  
547 inhibitor of apoptosis proteins function to block cell death. *Cell* 7, 1253–1262 (1995).
- 548 16. Herman-Bachinsky, Ryoo, H. D., Ciechanover, A. & Gonen, H. Regulation of the  
549 *Drosophila* ubiquitin ligase DIAP1 is mediated via several distinct ubiquitin system  
550 pathways. *Cell Death Diff.* 14, 861–871 (2007).
- 551 17. Vasudevan, D. & Ryoo, H. D. Regulation of cell death by IAPs and their antagonists.  
552 *Curr. Topic. Dev. Biol.* 114, 185–208 (2015).
- 553 18. Yoo, S, J. et al. Hay, Hid, Rpr and Grim negatively regulate DIAP1 levels through  
554 distinct mechanisms. *Nat. Cell Biol.* 4, 416–424 (2002).
- 555 19. Scott, J. G. et al. Towards the elements of successful insect RNAi. *J. Insect. Physiol.*  
556 59, 1212–1221 (2013).
- 557 20. Rodrigues, T. B., Dhandapani, R. K., Duan, J. J. & Palli, S. R. RNA interference in  
558 the Asian Longhorned Beetle: Identification of Key RNAi Genes and Reference Genes  
559 for RT-qPCR. *Sci. Rep.* 7, 8913 (2017).
- 560 21. Powell, M. et al. Insecticidal effects of dsRNA targeting the *Diap1* gene in dipteran  
561 pests. *Sci. Rep.* 7, 15147 (2017).
- 562 22. Mogilicherla, K., Howell, J. L. & Palli, S. R. Improving RNAi in the Brown  
563 Marmorated Stink Bug: Identification of target genes and reference genes for RT-qPCR.  
564 *Sci. Rep.* 8, 3720 (2018).
- 565 23. Walker III, W. B. & Allen, M. L. RNA interference-mediated knockdown of IAP in  
566 *Lygus lineolaris* induces mortality in adult and pre-adult life stages. *Entomol Exp. Appl.*



- 567 138, 83–92 (2011).
- 568 24. Rodrigues, T. B. et al. Development of RNAi method for screening candidate genes  
569 to control emerald ash borer, *Agilus planipennis*. *Sci. Rep.* 7, 7379 (2017).
- 570 25. Galdeano, D. M. et al. Oral delivery of double-stranded RNAs induces mortality in  
571 nymphs and adults of the Asian citrus psyllid, *Diaphorina citri*. *PLoS ONE*. 12, e0171847  
572 (2017).
- 573 26. Karpowicz, P., Perez, J. & Perrimon, N. The Hippo tumor suppressor pathway  
574 regulates intestinal stem cell regeneration. *Development*. 138, 4135–4145 (2010).
- 575 27 Hong, A. W., Meng, Z. & Guan, K. L. The Hippo pathway in intestinal regeneration  
576 and disease. *Nat. Rev. Gastroenterol. Hepatol.* 13, 324–337 (2016).
- 577 28. Gao, S. Y., Wang, Q. J. & Ji, Y. B. Effect of solanine on the membrane potential of  
578 mitochondria in HepG<sub>2</sub> cells and [Ca<sup>2+</sup>]<sub>i</sub> in the cells. *World J. Gastroenterol.* 7, 3359–  
579 3367 (2006).
- 580 29. Palli, S. R. RNA interference in Colorado potato beetle: steps toward development of  
581 dsRNA as a commercial insecticide. *Curr. Opin. Insect. Sci.* 6, 1–8 (2014).
- 582 30. Tian, H. et al. Developmental control of a lepidopteran pest *Spodoptera exigua* by  
583 ingestion of bacteria expressing dsRNA of a non-midgut gene. *PLoS ONE* 13, e6225  
584 (2009).
- 585 31. Li, X., Zhang, M. & Zhang, H. RNA Interference of Four Genes in Adult *Bactrocera*  
586 *dorsalis* by Feeding Their dsRNAs. *PLoS ONE* 6, e17788 (2011).
- 587 32. Yoon, J. S. et al. Double-stranded RNA binding protein, *Staufen*, is required for the  
588 initiation of RNAi in coleopteran insects. *Proc. Natl. Acad. Sci. USA*. 115, 8334–8339  
589 (2018).
- 590 33. Misof, B. et al. Phylogenomics resolves the timing and pattern of insect evolution.

- 591 *Science* 346, 763–767 (2014).
- 592 34. Niimi, T., Kuwayama, H. & Yaginuma, T. Larval RNAi applied to the analysis of  
593 postembryonic development in the ladybird beetle, *Harmonia axyridis*. *J. Insect*  
594 *Biotechnol. Sericol.* 74, 95-102 (2005).
- 595 35. Martin, M. Cutadapt removes adapter sequences from high-throughput sequencing  
596 reads. *EMBnet. journal* 17, 10-12 (2011).
- 597 36. Grabherr, M. G. et al. Trinity: reconstructing a full-length transcriptome without a  
598 genome from RNA-Seq data. *Nat. Biotechnol.* 29, 644-652 (2011).
- 599 37. Camacho, C. et al. BLAST+: architecture and applications. *BMC Bioinform.* 10, 421  
600 (2009).
- 601 38. Katoh, K. & Standley, D.M. MAFFT Multiple Sequence Alignment Software Version  
602 7: Improvements in performance and usability. *Mol. Biol. Evol.* 30, 772-780 (2013).
- 603 39. Capella-Gutiérrez, S., Silla-Martínez, J. M. & Gabaldón, T. trimAl: a tool for  
604 automated alignment trimming in large-scale phylogenetic analyses. *Bioinformatics* 25,  
605 1972-1973 (2009).
- 606 40. Kumar, S. et al. MEGA X: molecular evolutionary genetics analysis across computing  
607 platforms. *Mol. Biol. Evol.* 35, 1547-1549 (2018).
- 608 41. Untergasser, A. et al. Primer3—new capabilities and interfaces. *Nucleic Acids Res.* 40,  
609 e115 (2012).
- 610 42. Livak, K. J. & Schmittgen, T. D. Analysis of relative gene expression data using real-  
611 time quantitative PCR and the  $2^{-\Delta\Delta CT}$  method. *Methods* 25, 402-408 (2001).
- 612 43. Chintapalli, V. R., Wang, J. & Dow, J. A. Using FlyAtlas to identify better *Drosophila*  
613 *melanogaster* models of human disease. *Nat. Genet.* 39, 715-720 (2007).
- 614

615

## 616 **Acknowledgements**

617 We would like to thank to R. A. Zinna (Mars Hill University) for his critical read of this  
618 manuscript. We also thank J. Yatomi for helping in a part of this work and T. Ando, T.  
619 Nakamura and H. Sakai (National Institute for Basic Biology, Japan) for helpful  
620 discussions. We express our gratitude to C. Goto (NARO Agricultural Research Center,  
621 Japan) for providing *Helicoverpa armigera* and T. Konagaya (National Institute for Basic  
622 Biology, Japan) for the critical advice to statistical analysis. We thank the Model Plant  
623 Research Facility, NIBB BioResource Center for their technical support. This work was  
624 supported in part by the Center for the Promotion of Integrated Sciences (CPIS) of  
625 SOKENDAI (to T.N. and Y.S.).

626

## 627 **Contributions**

628 Y.C., H.Y., Y.S., T.Y. and T.N. conceived and designed the study. Y.C., H.K. and T.N.  
629 performed the majority of experiments. Y.C., T.S. and Y.S. analyzed RNA-seq data. H.K.  
630 maintained *H. vigintioctopunctata* and potato in laboratory. T.N. supervised the study. Y.C.  
631 and T.N. wrote the manuscript. All authors discussed the manuscripts.

632

## 633 **Competing interests**

634 The authors declare that no competing interests exist.

635

636

## 637 **Figure Legends**

638 **Fig. 1** Effects of f-RNAi of *diap1*, *v-ATPase A* and *v-ATPase E* in *H. vigintioctopunctata*.

639 **a** Tissue expression profile in 4th instar larva. nc, nerve cord; l, legs; wd, wing discs; fb,  
640 fatbody; mp, Malpighian tube; g, gut; c, carcass. **b** qRT-PCR in the larvae at two-days  
641 after f-RNAi. **c** Body-weight of the larvae at two-days after f-RNAi. **d** The leaves  
642 consumed by larvae two-days after f-RNAi. Scale, 10 mm. **e** Scheme of f-RNAi  
643 experiment to evaluate feeding disorders. **f** Leaf area consumed by the larvae for 0-24  
644 hours (dark gray) and 24-48 hours (right gray) after f-RNAi. *P*-values were calculated by  
645 Welch's *t*-test and adjusted by Holm's method for multiple comparisons. Adjusted *P*-  
646 values were shown in c and f, and non-significances were not shown. Data of b, c and f  
647 are mean  $\pm$  s.d.,  $n=7$  individual larvae for each f-RNAi treatment (black dot). Information  
648 for c and f are provided in Table S1.

649

650 **Fig. 2** Species-specificity and efficiency of *diap1* dsRNA. **a** Identity of *diap1* nucleotide  
651 among insects. Numbers in each column indicates the identity between species. Branches  
652 show the phylogenetic relationship<sup>33</sup>. **b** Image of sequence identity of *diap1* dsRNAs  
653 among insects. Blue bars indicate the identical nucleotide sites between *H.*  
654 *vigintioctopunctata* and each species. UTR, untranslated region; CDS, coding sequence;  
655 BIR, baculovirus inhibitor of apoptosis protein repeat; RING, really interesting new gene.  
656 **c** Area consumed by the larvae during 12-24 (upper) and 24-48 (lower) hours after various  
657 insect-derived *diap1* dsRNAs ingestion. **d** Area consumed by the *diap1* f-RNAi larvae  
658 treated with different amounts of dsRNA. Data of c and d are mean  $\pm$  s.d.,  $n=3$  in c and  
659  $n=4$  in d (black dot). *P*-values were calculated by Welch's *t*-test and adjusted by Holm's  
660 method. Adjusted *P*-values were shown in c and d, and non-significances were not shown.  
661 *Amel*, *Apis mellifera*; *Blat*, *Blatta lateralis*; *Bmor*, *Bombyx mori*; *Caqu*, *Cataglyphis*  
662 *aquilonaris*; *Dmel*, *Drosophila melanogaster*; *Hvig*, *Henosepilachna*

663 *vigintioctopunctata*; Harm, *Helicoverpa armigera*; Haxy, *Harmonia axyridis*; Ldec,  
664 *Leptinotarsa decemlineata*; Lmig, *Locusta migratoria*; Ofas, *Oncopeltus fasciatus*; Oyez,  
665 *Oxya yezoensis*. Information for a, c and d is provided in Tables S3, 4 and 5, respectively.

666

667 **Fig. 3** Recoverability, lethality and growth-inhibition of *diap1* f-RNAi in *H.*  
668 *vigintioctopunctata* larva. **a** Non-recoverability of feeding cessation of the *diap1* f-RNAi.  
669 The feeding cessation was caused within 48 hours after *diap1* f-RNAi with both the 50  
670 and 8 ng dsRNA and persists until death of the larvae. One larva fed with the 8 ng dsRNA  
671 showed slightly feeding in the day 3, but led to death in the day 4. The data shows mean  
672  $\pm$  s.d. The starting number of larvae was 7 for each f-RNAi treatment. According to their  
673 death, the number of larvae gradually reduced during the experiment. Black circles show  
674 the number of larvae in each day. Information is provided in Table S6. **b** The leaf  
675 consumed by *diap1* f-RNAi larvae. Scale, 10 mm. **c** Lethality of the *diap1* f-RNAi larvae.  
676 All of the *diap1* f-RNAi larvae led to death up to the day 6, in contrast to surviving of all  
677 of the control larvae fed with *egfp* dsRNA during the experiment. **d** Growth-inhibitory  
678 effect of *diap1* f-RNAi. The control larvae molted into 4th instar, but not the *diap1* f-  
679 RNAi larvae. The photos show the surviving larvae at the day3-4 and 4-5 in both *diap1*  
680 and *egfp* f-RNAi. The *egfp* f-RNAi larvae further grew into pupal stage in the day 8–10,  
681 in contrast to death of all *diap1* f-RNAi larvae up to the day 6. Scale, 3 mm.

682

683 FIGURES

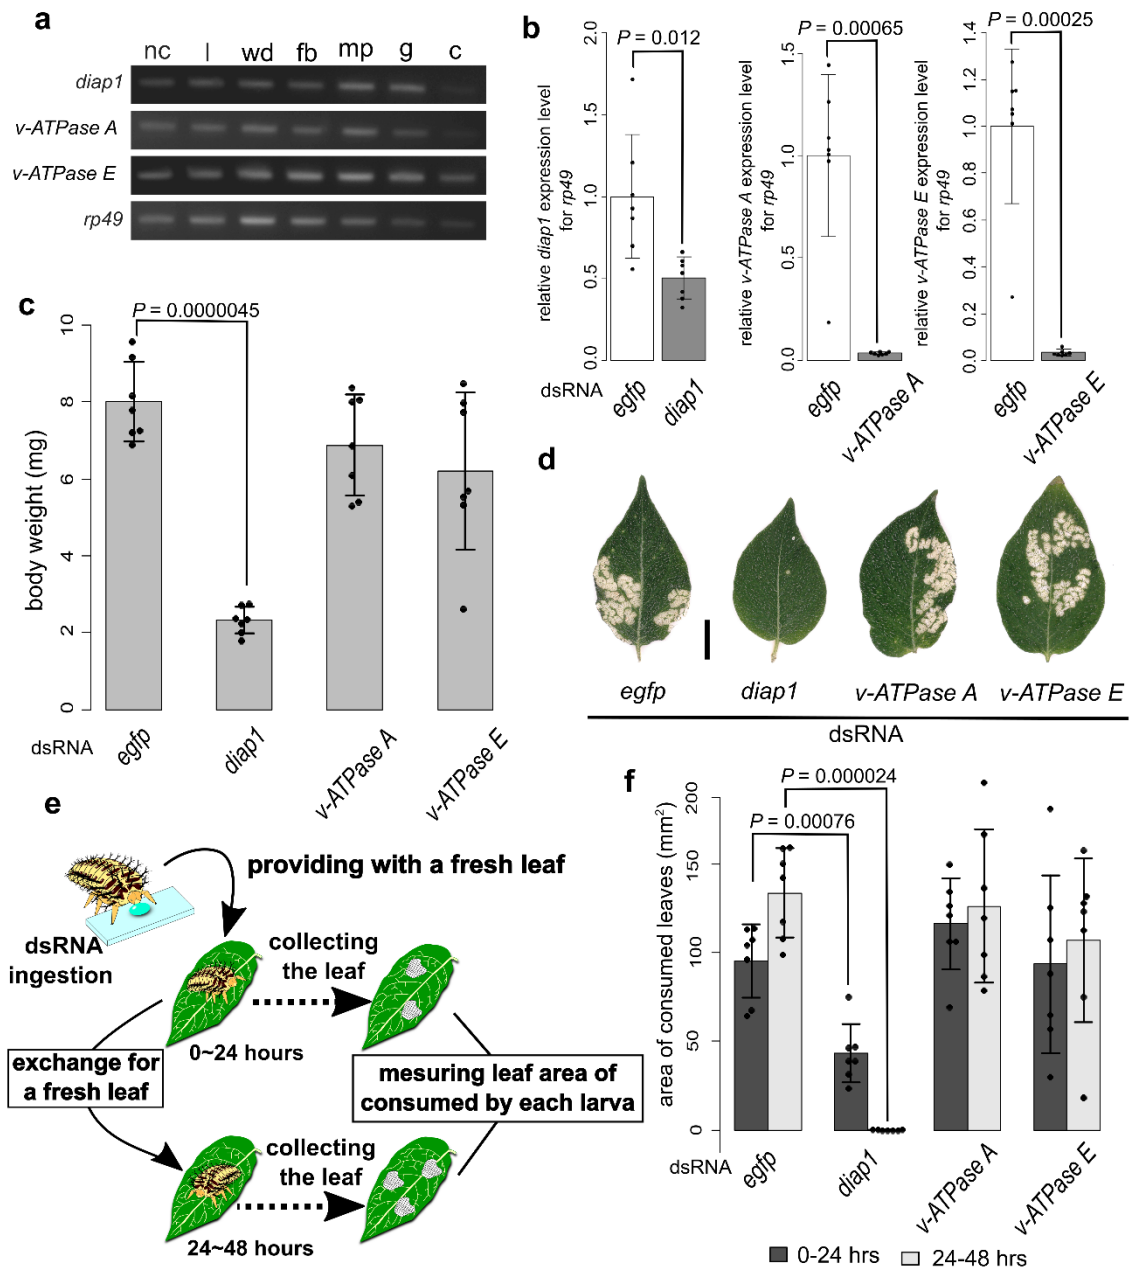

684

685 **Figure 1**

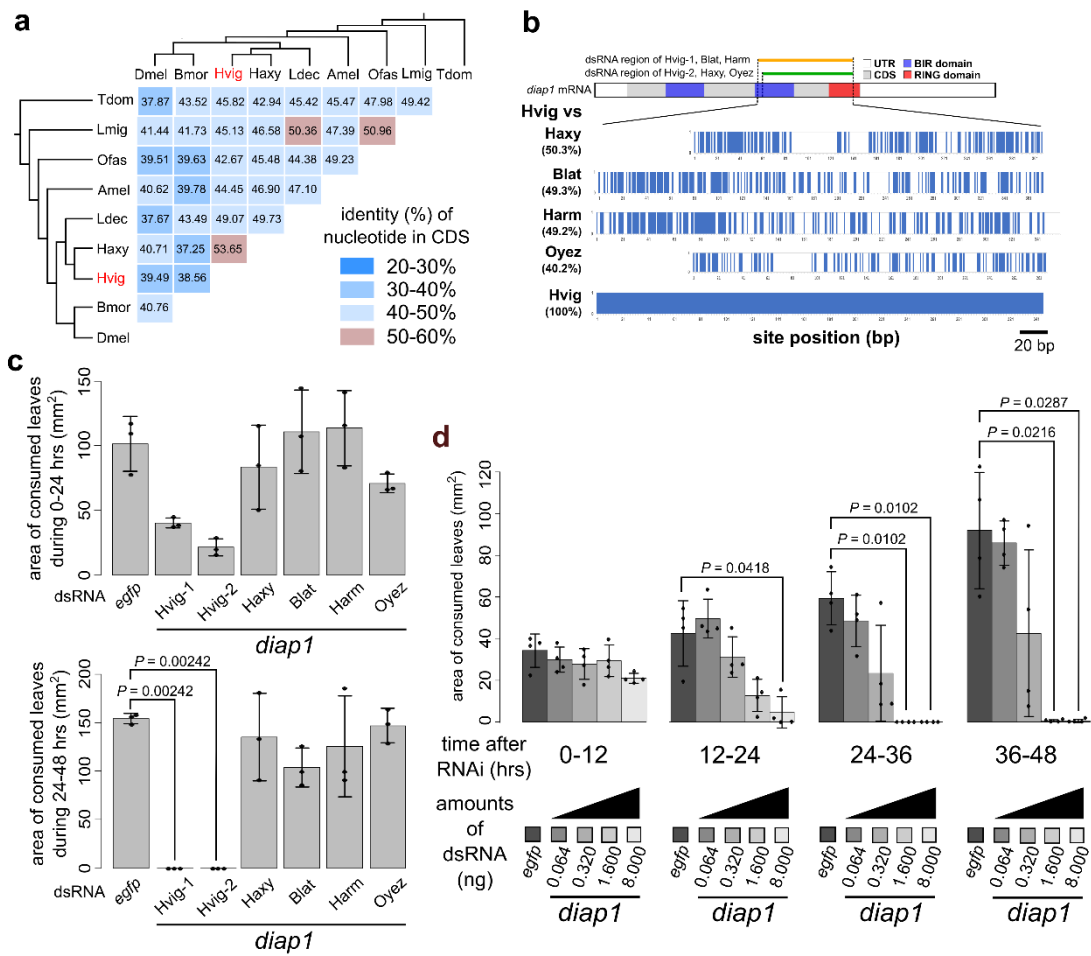

686

687 **Figure 2**

688

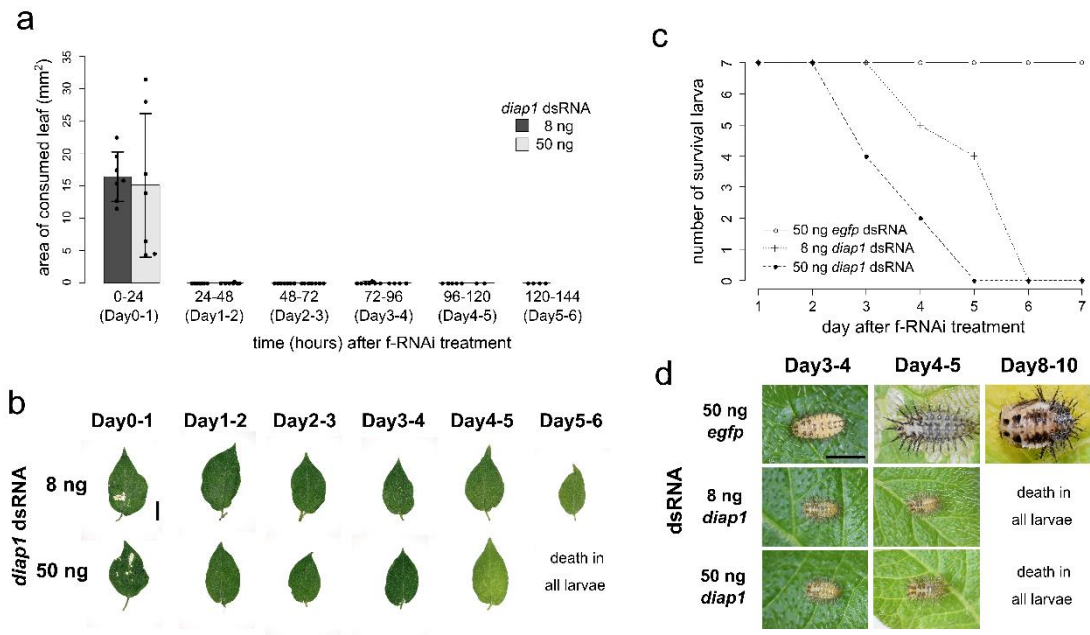

689

690 **Figure 3**

691
